# Supplementary material for: Hyaluronic acid drives mesenchymal stromal cell-derived extracellular matrix assembly by promoting fibronectin fibrillogenesis
Source: Royal Society of Chemistry journal article supplement (doi:10.1039/d1tb00268f), 2021-01-01
Supplement: d1tb00268f1.pdf [file d1tb00268f1.pdf]

### Hyaluronic acid drives mesenchymal stromal cell-derived extracellular matrix assembly by promoting fibronectin fibrillogenesis - Electronic Supplementary Information

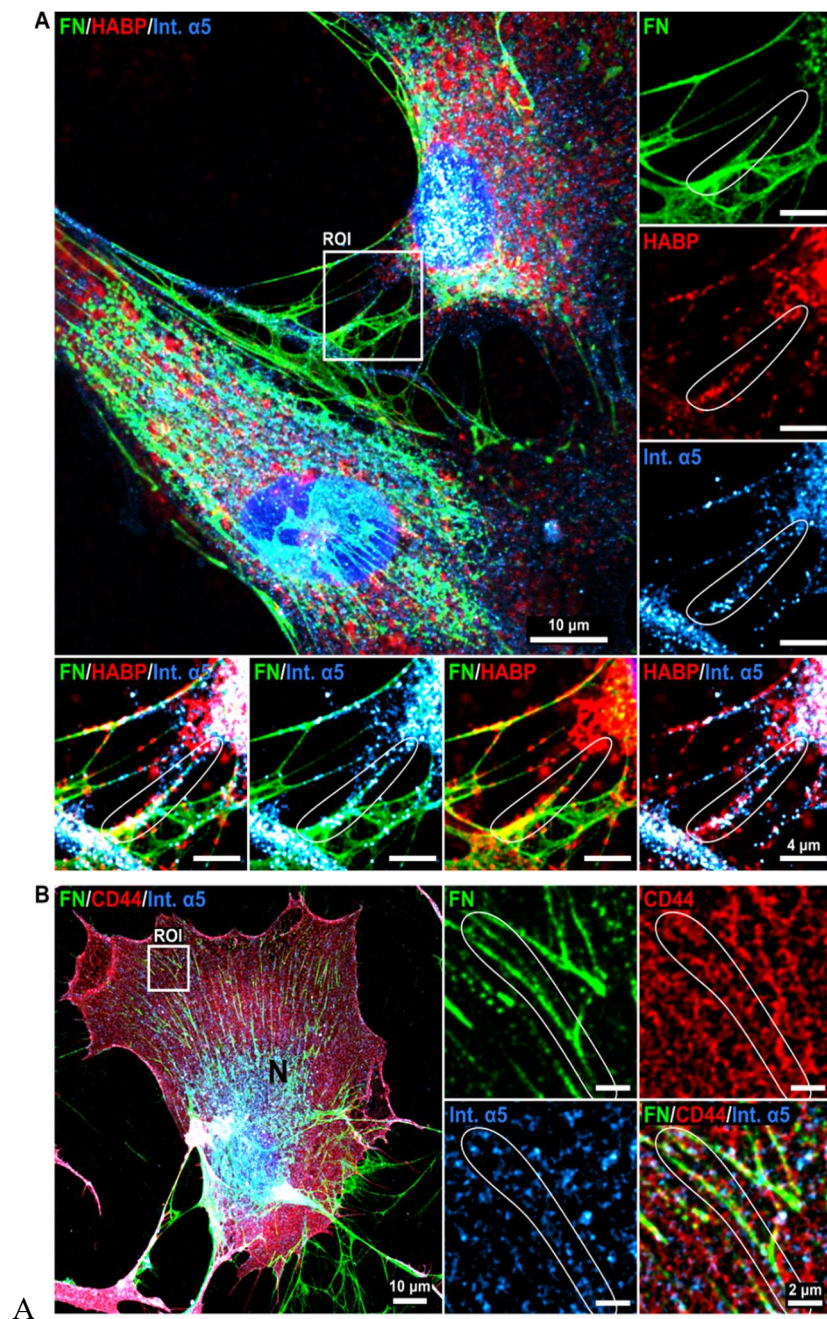

**Figure S1: HA and CD44 are present in loci of fibronectin assembly of HA supplemented cultures.** Confocal images of HABP-labeled HA and immunolabeled fibronectin (FN), CD44 and integrin  $\alpha 5$  (int.  $\alpha 5$ ) in human bmMSCs after 2 days of incubation with HA 500  $\mu\text{g}/\text{ml}$ . Squares indicate regions of interest (ROIs) that are magnified at the side and depict integrin  $\alpha 5$  at sites of active FN fibrillogenesis (fibrillar adhesions, indicated in circled areas) and HA (A) or CD44 (B).  $n=6$  biological replicates. Scale bar = 20  $\mu\text{m}$ , ROIs = 2  $\mu\text{m}$ .
